# Supplementary material for: An appraisal of drug development timelines in the Era of precision oncology
Source: PubMed Central journal article supplement (PMC5288167; doi:10.18632/oncotarget.10588), 2016-07-13
Supplement: oncotarget-07-53037-s001.pdf [file oncotarget-07-53037-s001.pdf]

## An appraisal of drug development timelines in the Era of precision oncology

### Supplementary Materials

**Supplementary Table S1: Description of FDA special access programs for drug development**

| Program                         | Description                                                                                                                                                                                                                                                                           | Start    |
|---------------------------------|---------------------------------------------------------------------------------------------------------------------------------------------------------------------------------------------------------------------------------------------------------------------------------------|----------|
| <b>Orphan Drug Designation</b>  | Provides a special status for a drug or biological intended to treat a rare disease. Qualifies the sponsor for development incentives, including tax credits.                                                                                                                         | Jan/1983 |
| <b>Fast Track</b>               | Designed to facilitate the development and review of drugs to treat serious and unmet needs. FDA offers more frequent meetings and written communication for Fast Track drugs and a rolling review for NDA/BLA application.                                                           | Nov/1997 |
| <b>Accelerated approval</b>     | Allows FDA to approve promising therapies based on a positive effect upon “surrogate endpoints” that are likely to predict clinical benefit. After approval, the sponsor may be required to conduct post-marketing trials to confirm benefits.                                        | Oct/1992 |
| <b>Priority Review</b>          | Designed to expedite the approval phase of new molecular entities from the standard 10 months to less than 6 months. The designation is determined at the time of BLA or NDA application.                                                                                             | Oct/1992 |
| <b>Breakthrough Designation</b> | Intended to expedite the development and review of drugs for serious or life-threatening conditions. Includes all fast track program features plus more intensive FDA guidance. Requires preliminary clinical evidence demonstrating substantial improvement over existing therapies. | Jul/2012 |

BLA: biologic license application; NDA: new drug application.

**Supplementary Table S2: List of included drugs and their respective timeline information, including access to FDA special programs.** See Supplementary\_Table\_S2

**Supplementary Table S3: Classification of drugs according to the criteria used to define a biomarker-driven treatment.** See Supplementary\_Table\_S3
